# Supplementary material for: Prevention of Encrustation on Ureteral Stents: Which Surface Parameters Provide Guidance for the Development of Novel Stent Materials?
Source: PubMed Central journal article supplement (PMC7182952; doi:10.3390/polym12030558), 2020-03-03
Supplement: polymers-12-00558-s001.pdf [file polymers-12-00558-s001.pdf]

## Supplementary Materials

# Prevention of encrustation on ureteral stents: Which surface parameters provide guidance for the development of novel stent materials?

By Henrike Rebl <sup>a\*</sup>, Jürgen Renner <sup>b</sup>, Wolfgang Kram <sup>c</sup>, Armin Springer <sup>d</sup>, Nele Fritsch <sup>a</sup>, Harald Hansmann <sup>b</sup>, Oliver W. Hakenberg <sup>c</sup> and J. Barbara Nebe <sup>a</sup>

### pH curve

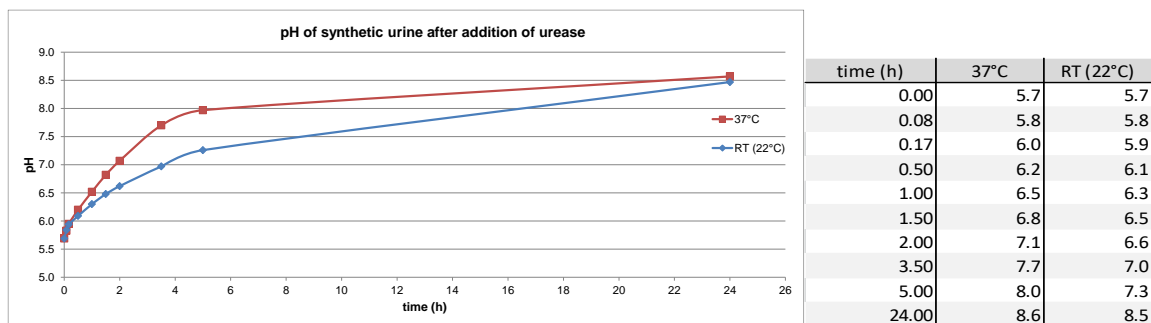

**Figure S1.** pH of synthetic urine: pH measurements of the synthetic urine inside the reaction chamber of the in vitro encrustation system. The pH rises as soon as the decomposition of urea by the enzyme urease starts. By the constant exchange of the liquid a pH equilibrium is reached after a few hours.

## Contact angle

|   |                       | Contact angle |    |        |    |                     |
|---|-----------------------|---------------|----|--------|----|---------------------|
|   |                       | pH 5.6        |    | pH 6.5 |    | No. of measurements |
|   |                       | mean          | SD | mean   | SD |                     |
| 1 | Elastollan 1185 A     | 84            | 15 | 85     | 13 | 5                   |
| 2 | Carbothane PC 3585A   | 127           | 4  | 92     | 2  | 3                   |
| 3 | Pelletane 2363 80A    | 102           | 4  | 105    | 5  | 5                   |
| 4 | Tecoflex EG 60D       | 112           | 3  | 111    | 2  | 5                   |
| 5 | Tecophilic HP-93A-100 | 106           | 5  | 104    | 6  | 6                   |
| 6 | Tecothane TT 1095     | 115           | 3  | 104    | 4  | 5                   |
| 7 | Styroflex 2G66        | 99            | 3  | 85     | 5  | 4                   |
| 8 | Greenflex FL 65       | 79            | 5  | 86     | 1  | 4                   |

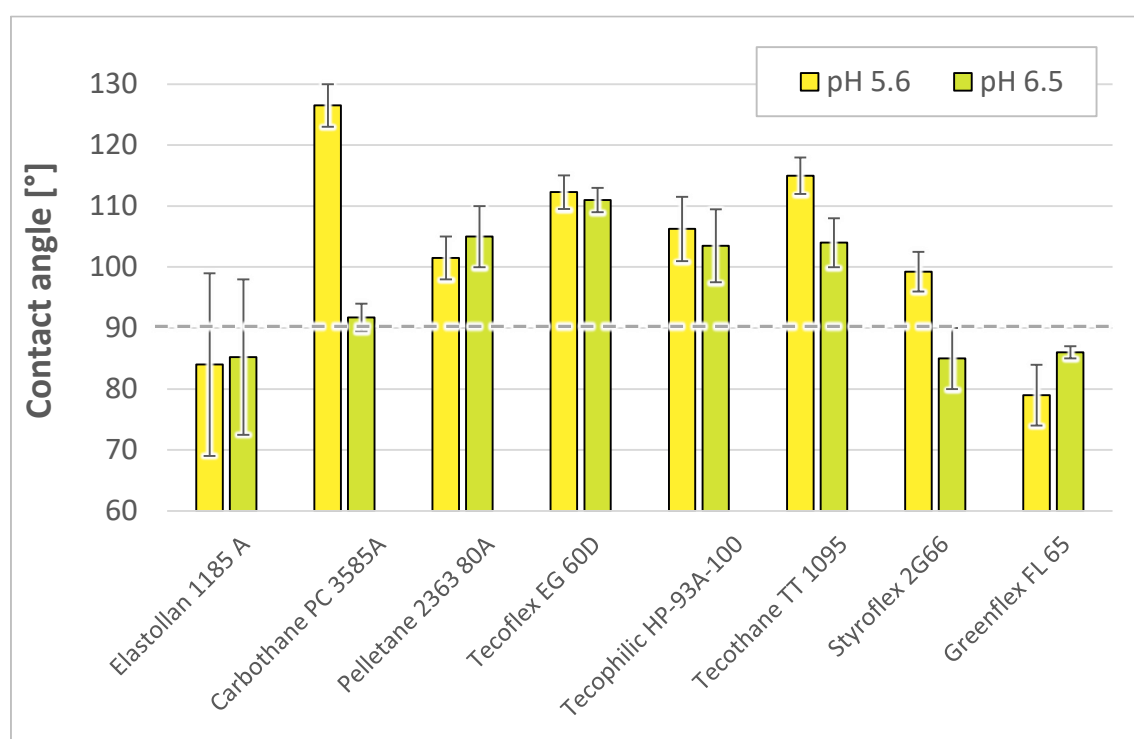

**Figure S2.** Contact angle: Contact angle of the various polymers measured with synthetic urine at different pH values. Mean +/- SD

## EDX

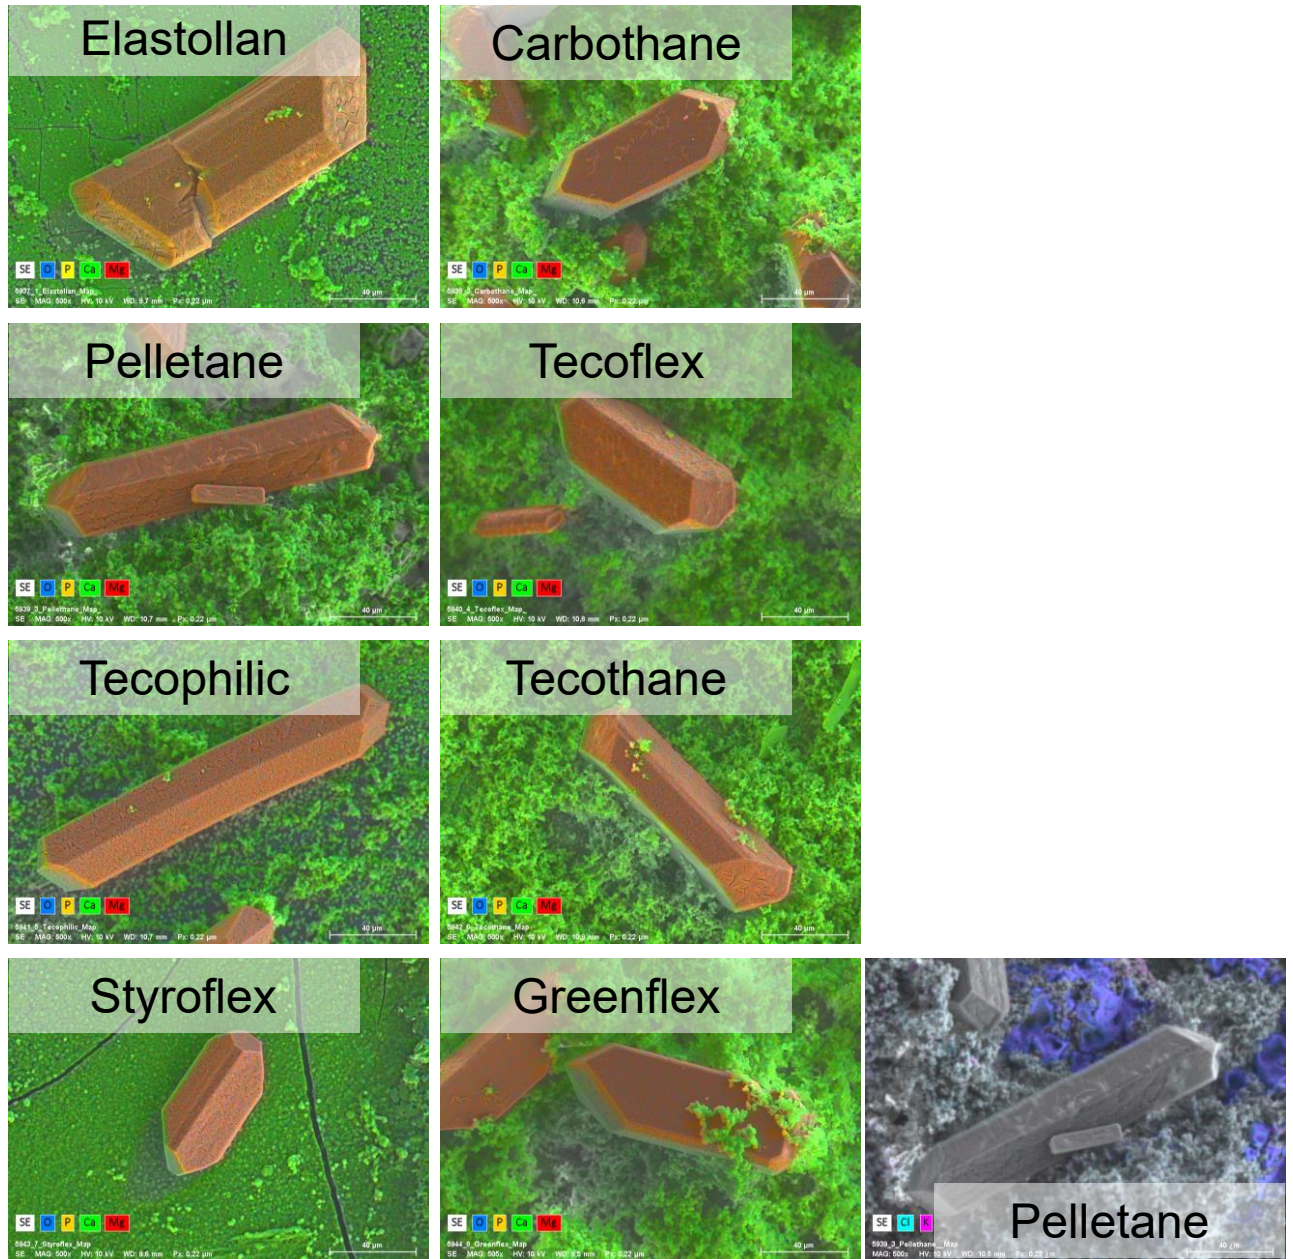

**Figure S3.** EDX analyses: Overview of the mineral deposits on the polymer surfaces. We aimed at showing carbonate apatite and struvite crystals on all images, even though struvite crystals are very rare on Elastollan, Styroflex and Greenflex. The green (calcium phosphate/apatite) matrix is rather thin on Elastollan, Styroflex and Greenflex – Group 1 – sparsely encrusted polymers.

On the other polymers one can clearly see a multi-layered matrix of apatite crystallites, with struvite crystals embedded in these thick depositions. Solely on Pelletane we additionally found potassium chloride crystals randomly distributed over the surface and embedded in the calcium phosphate crystallites. (FE-SEM Merlin® VP Compact (Zeiss) with EDX detector (XFlash 6/30, Bruker)

# FTIR

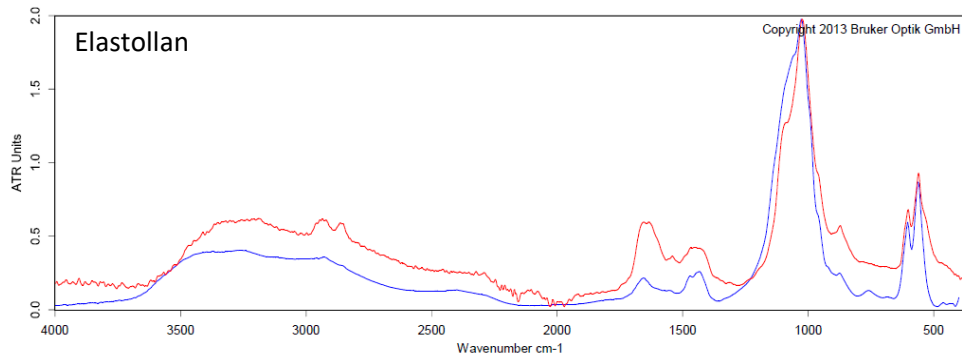

| Color | Hit quality | Compound name                                | Compound ratio [%] |
|-------|-------------|----------------------------------------------|--------------------|
| Red   |             | Elastollan                                   |                    |
| Blue  | 776         | whitlockite<br>carbonate apatite<br>struvite | 60<br>20<br>20     |

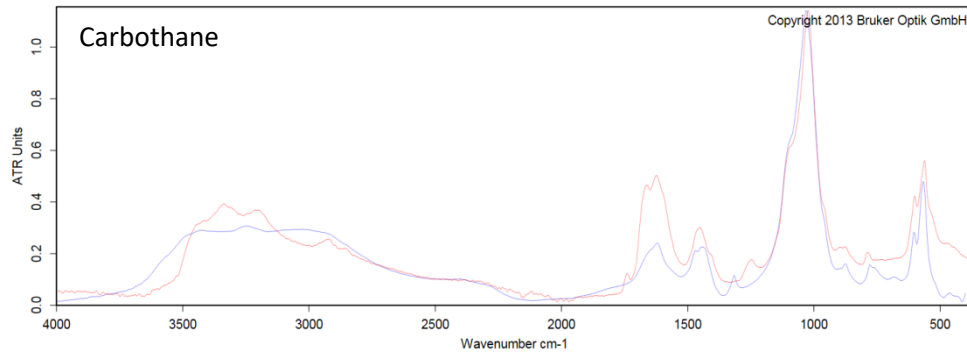

| Color | Hit quality | Compound name                               | Compound ratio [%] |
|-------|-------------|---------------------------------------------|--------------------|
| Red   |             | Carbothane                                  |                    |
| Blue  | 928         | carbonate apatite<br>Struvite<br>whewellite | 50<br>40<br>10     |

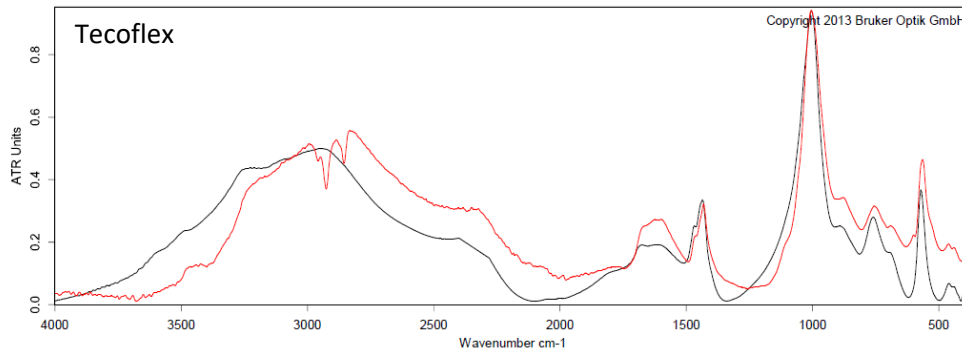

| Color | Hit quality | Compound name                 | Compound ratio [%] |
|-------|-------------|-------------------------------|--------------------|
| Red   |             | Tecoflex                      |                    |
| Black | 663         | struvite<br>carbonate apatite | 95<br>5            |

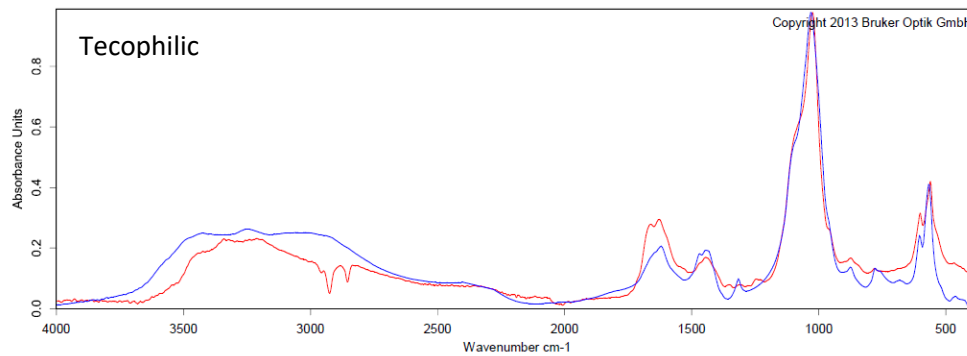

| Color | Hit quality | Compound name                               | Compound ratio [%] |
|-------|-------------|---------------------------------------------|--------------------|
| Red   |             | Tecophilic                                  |                    |
| Blue  | 699         | carbonate apatite<br>struvite<br>whewellite | 50<br>40<br>10     |

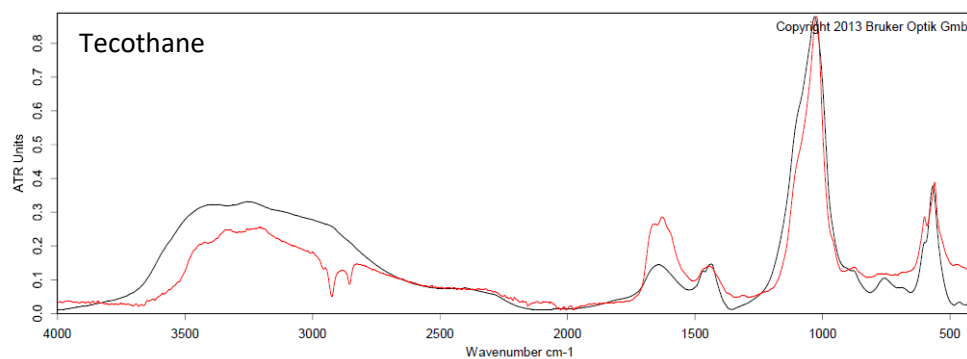

| Color | Hit quality | Compound name                                                       | Compound ratio [%] |
|-------|-------------|---------------------------------------------------------------------|--------------------|
| Red   |             | Tecothane                                                           |                    |
| Black | 757         | amorph. carbonated<br>ca-phosphate<br>struvite<br>carbonate apatite | 50<br>30<br>20     |

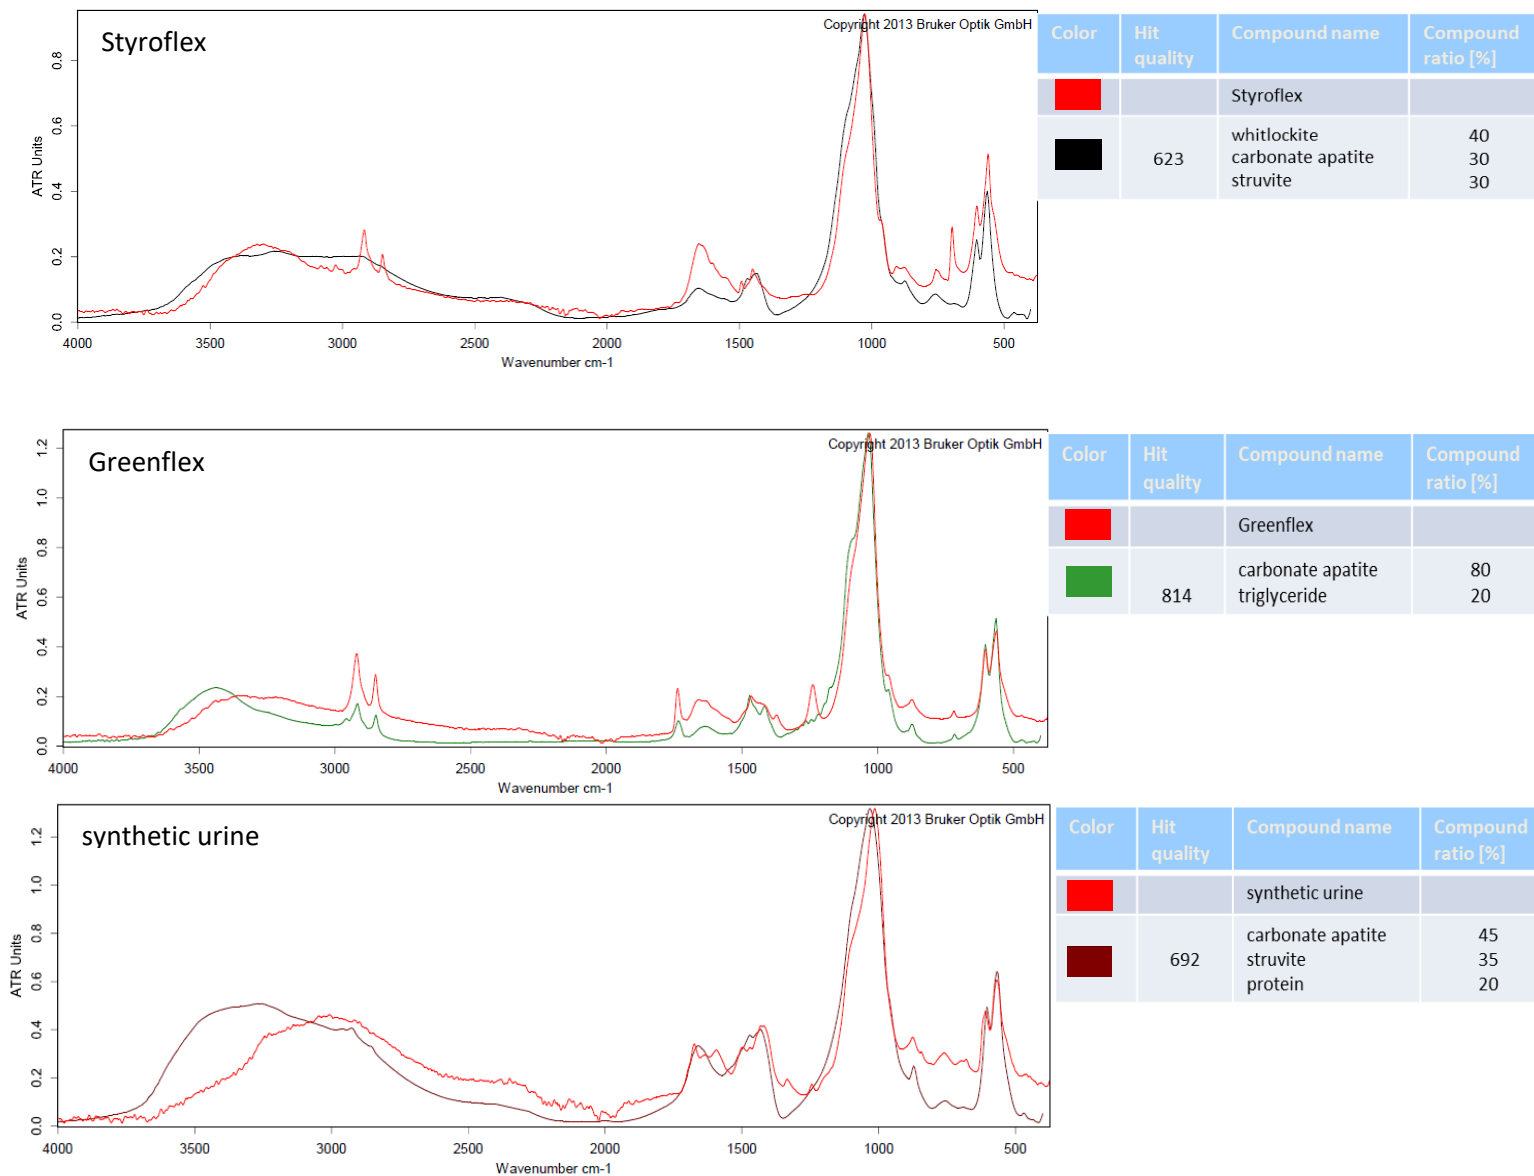

**Figure S4.** FTIR measurements of the mineral deposits on the polymer samples (Elastollan, Carbothane, Pelletane, Tecoflex, Thecophilic, Tecothane, Styroflex and Greenflex). The measured curve is colored in red. The best fit of the OPUS library (Bruker) with percentual composition is indicated in the table on the right with the respective color in the graph and in the table.
